# Supplementary material
Source: publisher figshare collection journal article supplement (https://frontiersin.figshare.com/ndownloader/files/12400874)
Supplement: Supplementary file [file 12400874]

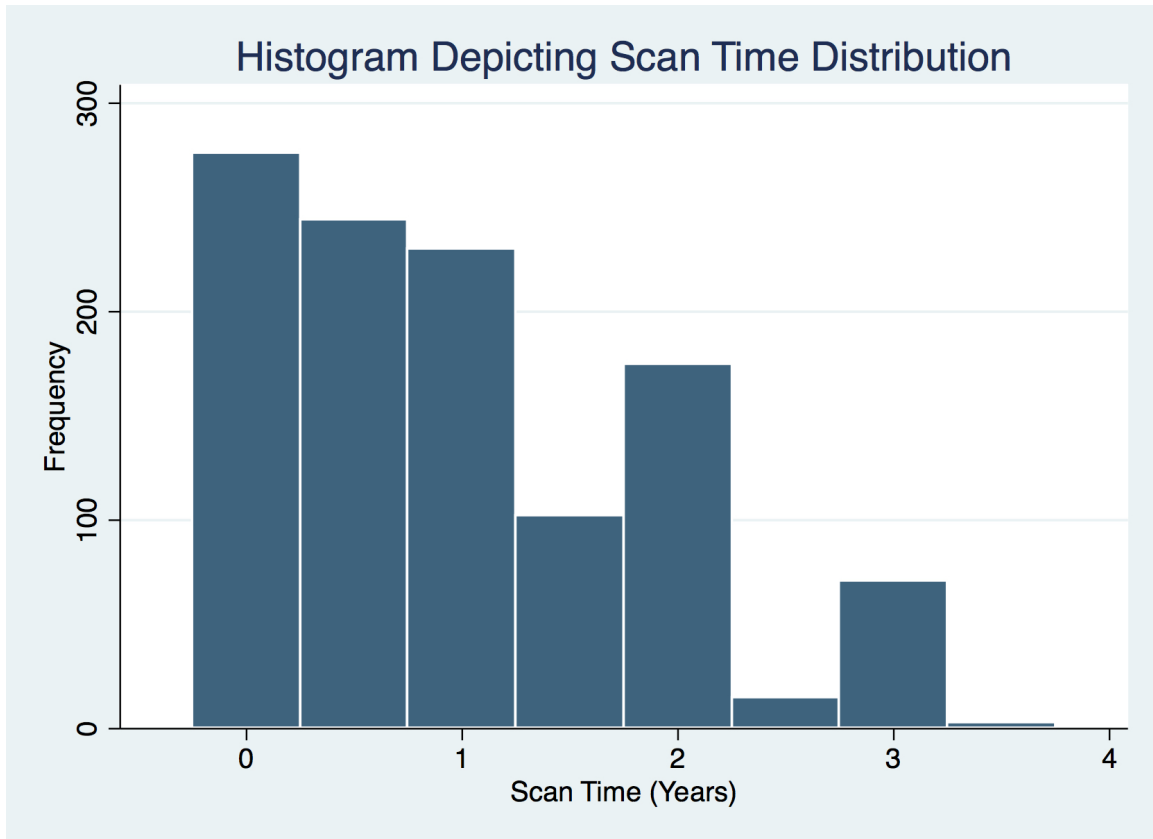

**Supplementary Figure 1.** Histogram of MRI scans across all participants with neuroimaging data in this study.
